# Supplementary material for: Community perceptions of targeted anti-malarial mass drug administrations in two provinces in Vietnam: a quantitative survey
Source: Springer Nature journal article supplement (doi:10.1186/s12936-016-1662-2), 2017-01-06

## Supplementary materials

**Figure S1:** Comparison of what respondents do to prevent malaria with number of doses ingested

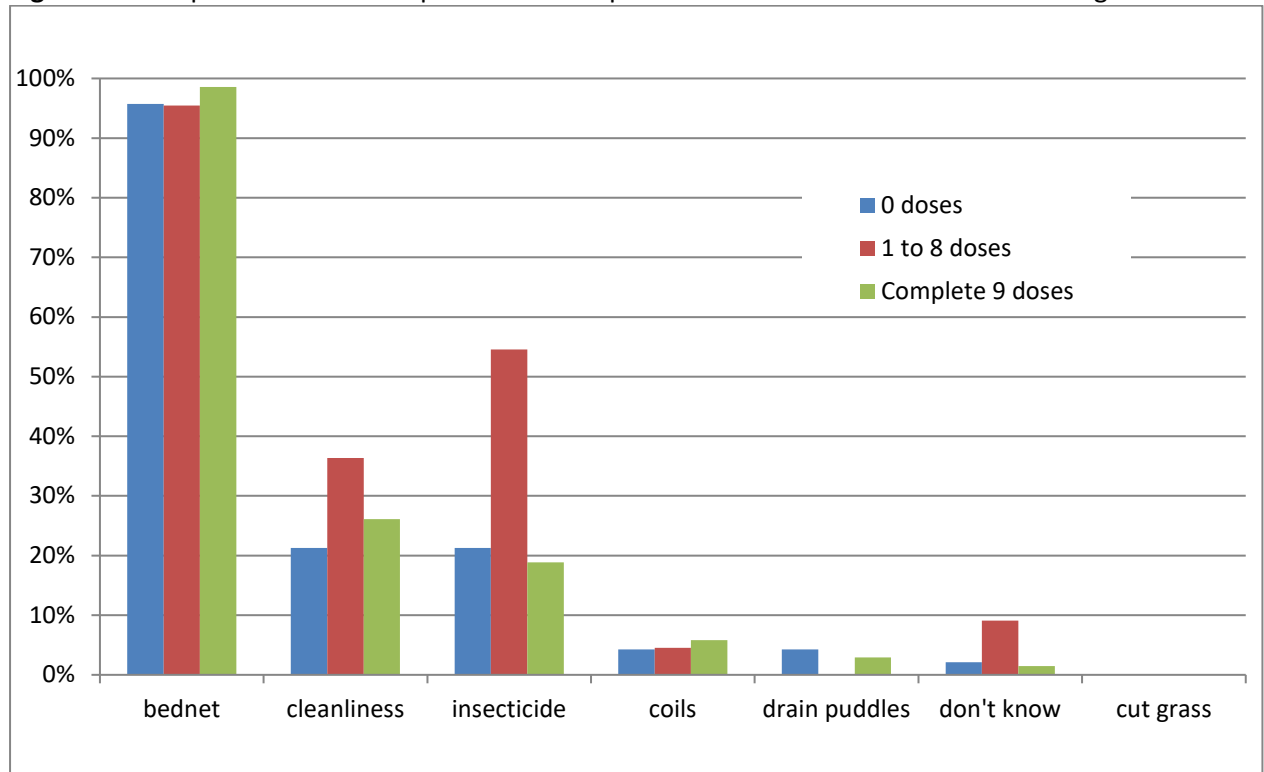

**Figure S2:** What kind of complaints do people with malaria have?

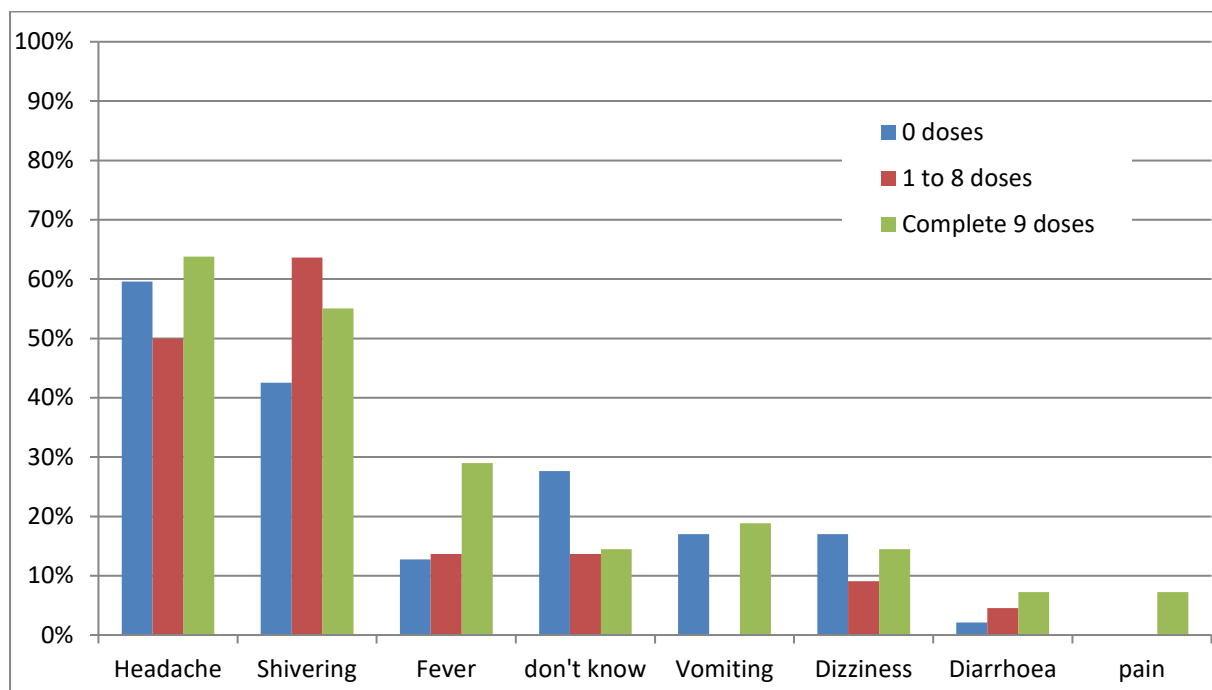

Supplement: MOESM1 [file 11981762]
